# Supplementary material for: AbobotulinumtoxinA is effective in patients with urinary incontinence due to neurogenic detrusor overactivity regardless of spinal cord injury or multiple sclerosis etiology: Pooled analysis of two phase III randomized studies (CONTENT1 and CONTENT2)
Source: PubMed Central journal article supplement — Neurourol Urodyn. 2022 Nov 2;42(1):153–67. doi: 10.1002/nau.25062 (PMC10092111; doi:10.1002/nau.25062), 2022-11-02
Supplement: NAU-42-153-s003.pdf [file NAU-42-153-s003.pdf]

Screened  
N=719

Randomized  
N=485

Placebo  
N=162

AboBoNT-A 600 U  
N=162

AboBoNT-A 800 U  
N=161

SCI  
n=113

MS  
n=49

SCI  
n=114

MS  
n=48

SCI  
n=114

MS  
n=47
