# Supplementary material for: AbobotulinumtoxinA is effective in patients with urinary incontinence due to neurogenic detrusor overactivity regardless of spinal cord injury or multiple sclerosis etiology: Pooled analysis of two phase III randomized studies (CONTENT1 and CONTENT2)
Source: PubMed Central journal article supplement — Neurourol Urodyn. 2022 Nov 2;42(1):153–67. doi: 10.1002/nau.25062 (PMC10092111; doi:10.1002/nau.25062), 2022-11-02
Supplement: NAU-42-153-s004.pdf [file NAU-42-153-s004.pdf]

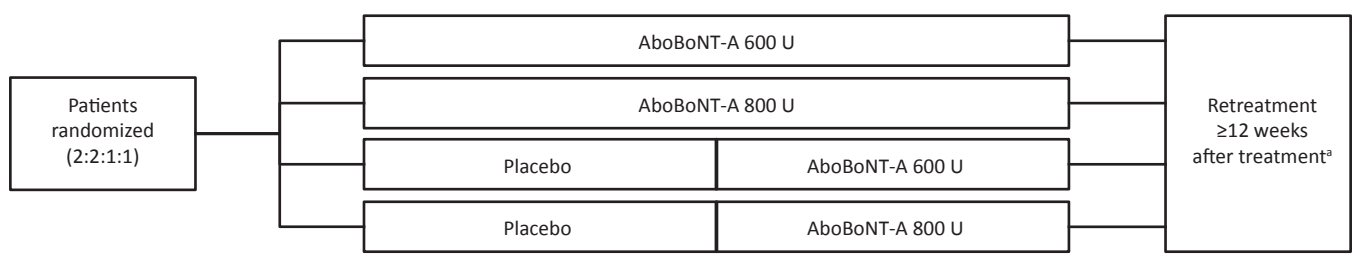

Patients  
randomized  
(2:2:1:1)

AboBoNT-A 600 U

AboBoNT-A 800 U

Placebo

AboBoNT-A 600 U

Placebo

AboBoNT-A 800 U

Retreatment  
 $\geq 12$  weeks  
after treatment<sup>a</sup>
